# Supplementary material for: Metabolomic analysis reveals stress tolerance mechanisms in common bean ( Phaseolus vulgaris L.) related to treatment with a biostimulant obtained from Corynebacterium glutamicum
Source: Royal Society of Chemistry journal article supplement (doi:10.1039/d3mo00110e), 2023-07-28

## Supporting information

**Table A.1.** MZmine parameters used in pre-processing MS data analysis.

| Method                                                                | Parameters                            | Value           |
|-----------------------------------------------------------------------|---------------------------------------|-----------------|
| <b>Mass detection MS<sup>1</sup></b>                                  | Mass detector                         | Centroid        |
|                                                                       | Noise level                           | 1E <sup>7</sup> |
| <b>Mass detection MS<sup>2</sup></b>                                  | Noise level                           | 1E <sup>3</sup> |
| <b>Chromatogram building</b><br>(ADAP Chromatogram builder)           | Min. group size in # of scans         | 4               |
|                                                                       | Group intensity threshold             | 3E <sup>7</sup> |
|                                                                       | Min. highest intensity                | 3E <sup>7</sup> |
|                                                                       | <i>m/z</i> tolerance                  | 10 ppm          |
| <b>Chromatogram deconvolution</b><br>(Local minimum search algorithm) | Chromatographic threshold             | 10%             |
|                                                                       | Search min. in RT range               | 0.01 min        |
|                                                                       | Min. relative height                  | 10%             |
|                                                                       | Min. absolute height                  | 3E <sup>7</sup> |
|                                                                       | Min. ratio of peak top/edge           | 2               |
|                                                                       | Peak duration range                   | 0.05 - 2.00 min |
|                                                                       | <i>m/z</i> range for MS2 scan pairing | 0.01 Da         |
| <b>Isotope grouping</b><br>(Isotopic peaks grouper)                   | <i>m/z</i> tolerance                  | 10 ppm          |
|                                                                       | Retention time tolerance              | 0.02 min        |
|                                                                       | Maximum charge                        | 2               |
| <b>Feature alignment</b><br>(Join aligner)                            | <i>m/z</i> tolerance                  | 10 ppm          |
|                                                                       | Weight for <i>m/z</i>                 | 75              |
|                                                                       | Retention time tolerance              | 0.05 min        |
| <b>Isotope filter and others</b><br>(Feature list rows filter)        | Weight for RT                         | 25              |
|                                                                       | Min. peaks in a row                   | 2               |
|                                                                       | Keep only peaks with MS2 scan         | Selected        |
| <b>Gap filling</b><br>(Peak finder)                                   | Intensity tolerance                   | 10%             |
|                                                                       | <i>m/z</i> tolerance                  | 10 ppm          |
|                                                                       | Retention time tolerance              | 0.05 min        |

**Table A.2.** Features detected in Vorax™ data using MZmine 2.53 according to parameters shown in Table A.1.

| <b>Sample<br/>Label</b> | V1_25.mzXML<br>Vorax 25 min | V2_25.mzXML<br>Vorax 25 min | V1_30.mzXML<br>Vorax 30 min | V2_30.mzXML<br>Vorax 30 min |
|-------------------------|-----------------------------|-----------------------------|-----------------------------|-----------------------------|
| 1/111.0204mz/18.81min   | 4.64E+08                    | 4.53E+08                    | 287630.3998                 | 215932.7659                 |
| 2/154.9902mz/18.92min   | 6.82E+08                    | 7.05E+08                    | 8425.767673                 | 6454.069045                 |
| 3/110.0202mz/18.90min   | 7.26E+08                    | 7.24E+08                    | 20964.2658                  | 9543.340144                 |
| 4/113.9637mz/18.92min   | 5.03E+08                    | 4.84E+08                    | 3402.150537                 | 1822.245117                 |
| 5/139.9880mz/18.81min   | 2.12E+08                    | 2.06E+08                    | 112757.5261                 | 66297.10008                 |
| 6/102.0340mz/18.84min   | 2.03E+08                    | 2.08E+08                    | NA                          | NA                          |
| 7/112.0181mz/18.80min   | 1.60E+08                    | 1.63E+08                    | 86959.79605                 | 91130.41563                 |
| 8/149.0234mz/18.80min   | 5.76E+08                    | 5.98E+08                    | 2058551.385                 | 1563215.175                 |
| 9/279.1590mz/18.79min   | 5.53E+08                    | 5.89E+08                    | 3872478.106                 | 6534015.295                 |
| 10/111.0204mz/22.35min  | 51679.53852                 | 30781.27165                 | 7.87E+08                    | 8.39E+08                    |
| 11/110.0202mz/22.50min  | 163931.3796                 | 147936.5471                 | 1.13E+09                    | 1.14E+09                    |
| 12/154.9903mz/22.50min  | 318126.9205                 | 482037.643                  | 1.16E+09                    | 1.16E+09                    |
| 13/139.9881mz/22.36min  | 8169.156328                 | 18785.8942                  | 3.60E+08                    | 3.69E+08                    |
| 14/113.9637mz/22.50min  | 1824060.092                 | 574990.6511                 | 7.11E+08                    | 7.25E+08                    |
| 15/102.0340mz/22.43min  | 110795.6055                 | 191195.5768                 | 3.40E+08                    | 3.61E+08                    |
| 16/112.0181mz/22.35min  | 9182.209292                 | 33141.90933                 | 2.85E+08                    | 2.93E+08                    |
| 17/123.0405mz/22.36min  | 144313.1498                 | 225371.2682                 | 2.33E+08                    | 2.41E+08                    |
| 18/149.0234mz/22.40min  | 2.69E+07                    | 2.76E+07                    | 4.70E+08                    | 1.83E+08                    |
| 19/279.1591mz/22.22min  | 7.97E+07                    | 1.77E+07                    | 3.56E+08                    | 1.28E+09                    |
| 20/149.0234mz/22.27min  | 4.63E+07                    | 3.53E+07                    | 2.41E+08                    | 2.96E+08                    |
| 21/279.1590mz/22.27min  | 5.73E+07                    | 1.45E+07                    | 2.32E+08                    | 3.92E+08                    |
| 22/536.1649mz/16.53min  | 61532.91271                 | 41737.55105                 | 38567.2023                  | 108063.4168                 |
| 23/148.0606mz/0.80min   | 4.11E+08                    | 3.86E+08                    | 3.81E+08                    | 3.35E+08                    |
| 24/118.0863mz/0.84min   | 1.03E+08                    | 3.61E+08                    | 2.42E+08                    | 2.09E+08                    |
| 25/104.1071mz/0.77min   | 2.63E+08                    | 2.84E+08                    | 2.25E+08                    | 2.20E+08                    |
| 26/199.1078mz/1.45min   | 1.17E+08                    | 1.23E+08                    | 1.53E+08                    | 1.14E+08                    |
| 27/247.1289mz/1.50min   | 1.64E+08                    | 8.94E+07                    | 1.22E+08                    | 9.22E+07                    |
| 28/213.1232mz/2.16min   | 1.48E+08                    | 1.19E+08                    | 1.33E+08                    | 1.39E+08                    |
| 29/149.0234mz/22.37min  | 2.69E+07                    | 4.19E+07                    | 1.28E+09                    | 1.89E+08                    |
| 30/279.1590mz/22.36min  | 1.69E+07                    | 1.45E+07                    | 1.25E+09                    | 2.23E+08                    |
| 31/132.1020mz/1.15min   | 3.67E+08                    | 3.26E+08                    | 2.98E+08                    | 4.04E+08                    |
| 32/130.0500mz/0.98min   | 1.99E+08                    | 2.13E+08                    | 3.82E+07                    | 1.18E+08                    |
| 33/118.0863mz/0.89min   | 1.79E+08                    | 1.39E+08                    | 8.41E+07                    | 1.11E+08                    |
| 34/116.0707mz/0.80min   | 2.74E+08                    | 2.07E+08                    | 2.57E+08                    | 2.40E+08                    |
| 35/148.0605mz/0.89min   | 1.14E+08                    | 9.49E+07                    | 5.64E+07                    | 4.28E+07                    |
| 36/130.0501mz/0.90min   | 2.91E+08                    | 2.84E+08                    | 9.32E+07                    | 3.06E+08                    |
| 37/149.0234mz/22.25min  | 5.83E+07                    | 3.18E+07                    | 3.48E+08                    | 1.35E+09                    |
| 38/279.1591mz/6.14min   | 2.45E+07                    | 1.65E+07                    | 5.25E+07                    | 5.78E+08                    |
| 39/156.9907mz/22.36min  | 8447.341162                 | 14201.04281                 | 1.89E+08                    | 1.62E+08                    |
| 40/149.0235mz/6.08min   | 4.27E+07                    | 6.62E+07                    | 2.17E+07                    | 3.46E+08                    |
| 41/149.0234mz/4.72min   | 3.10E+07                    | 2.37E+07                    | 2.14E+07                    | 6.83E+07                    |
| 42/149.0235mz/5.34min   | 1.07E+07                    | 3.39E+07                    | 4.69E+07                    | 3.30E+08                    |

**Fig S1.** PLS-DA scores plot of leaf extracts from non-treated (C) and Vorax™-treated (T) samples with 35% of the total variance (28.6% for Component 1 and 6.4% for Component 2). The data were acquired by UHPLC-MS/MS, positive mode, with  $n = 5$  (three repetitions).

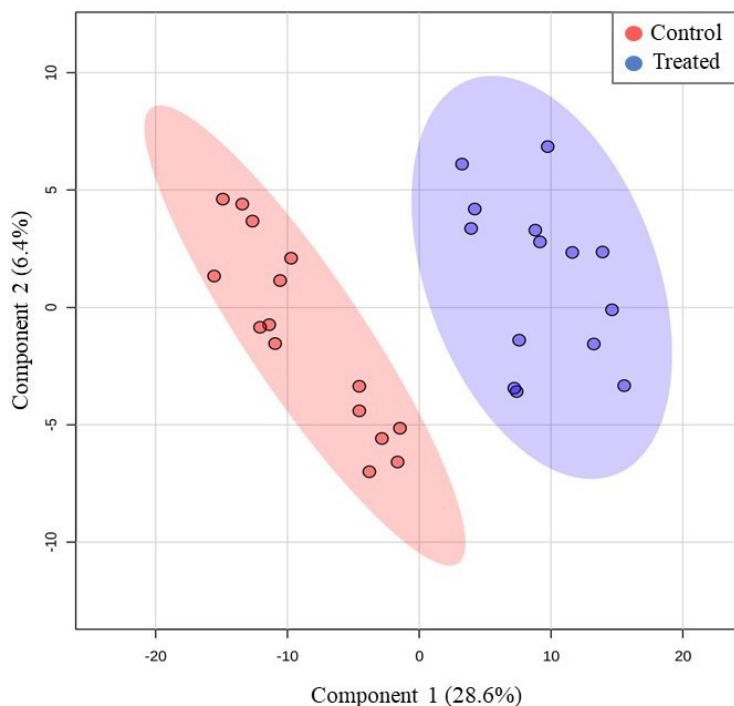

**Fig S2.** MS/MS spectra of  $m/z$  148.0605  $[M+H]^+$  annotated as Glutamic acid.

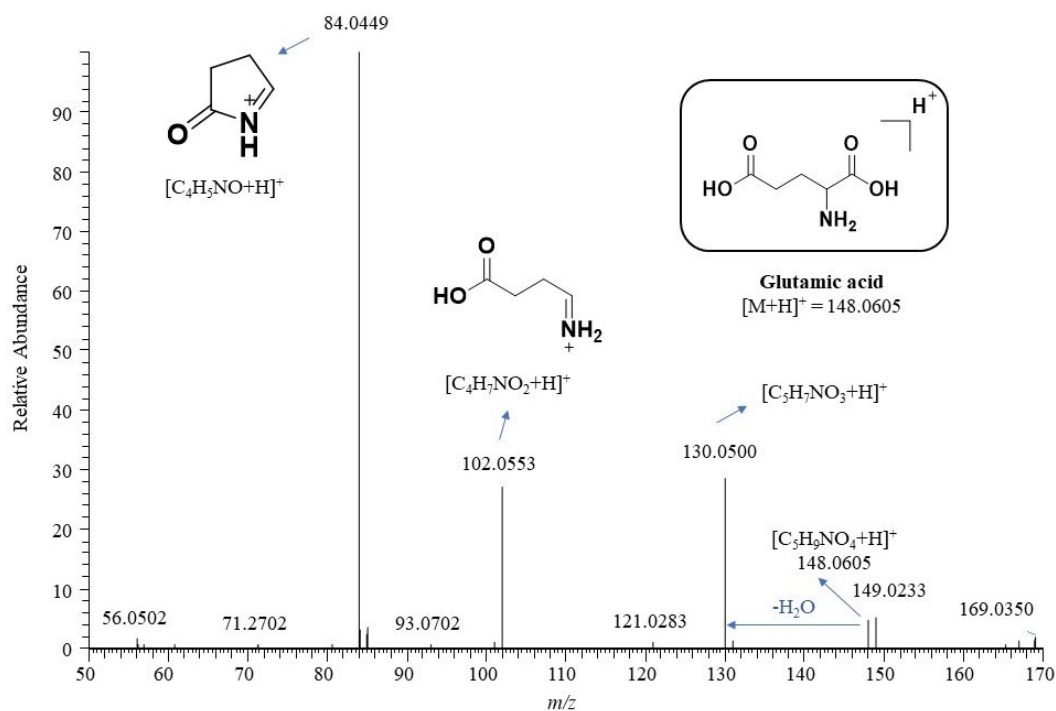

**Fig S3.** MS/MS spectra of  $m/z$  595.1658  $[M+H]^+$  annotated as Nicotiflorin.

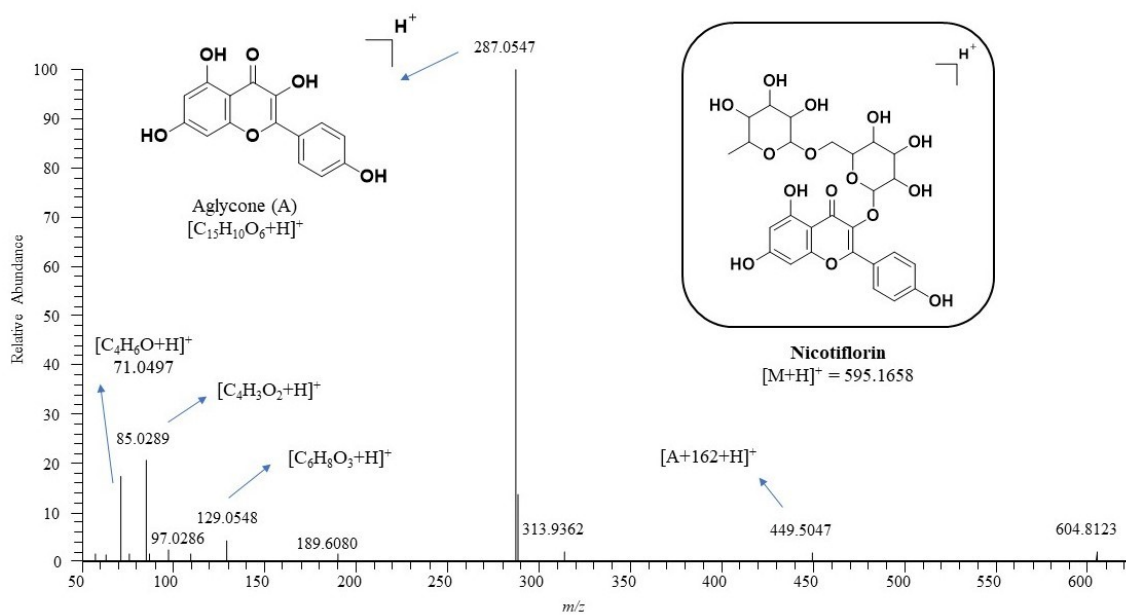

**Fig S4.** MS/MS spectra of  $m/z$  353.2687  $[M+H]^+$  annotated as 1-linolenylglycerol.

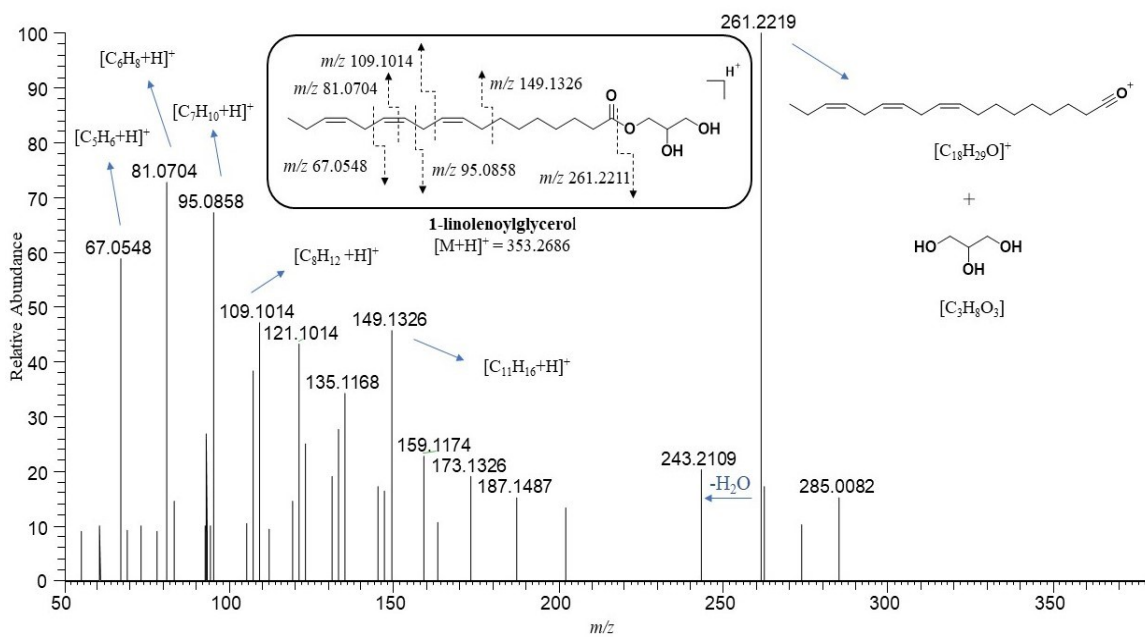

**Fig S5.** MS/MS spectra of  $m/z$  532.3482  $[M+NH_4]^+$  annotated as 1-linolenoyl-3-galactopyranosyl- glycerol.

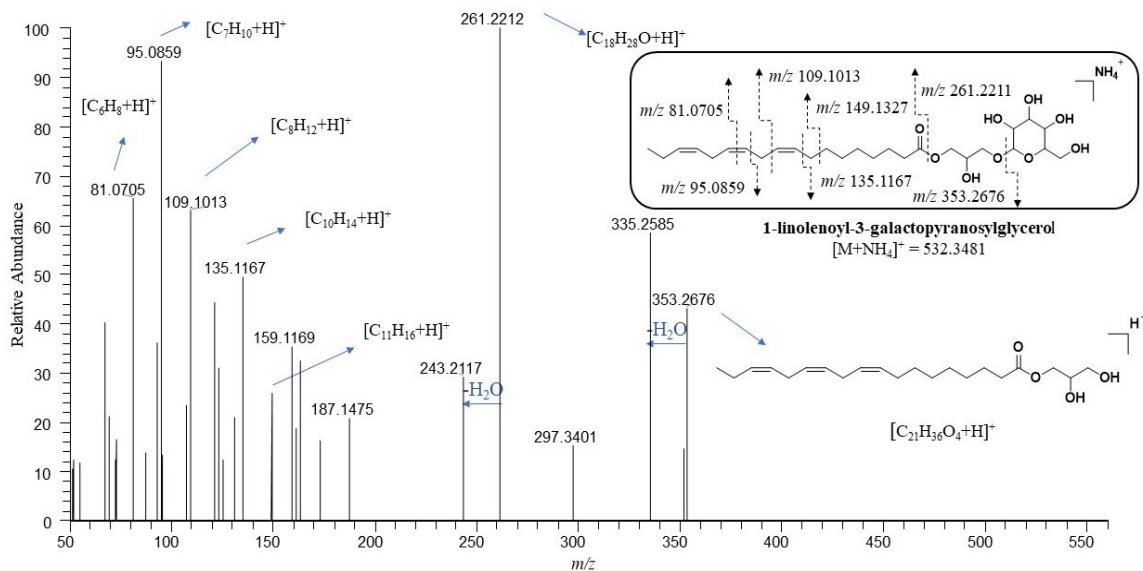

**Fig S6.** MS/MS spectra of  $m/z$  694.4003  $[M+NH_4]^+$  annotated as gingerglycolipid A.

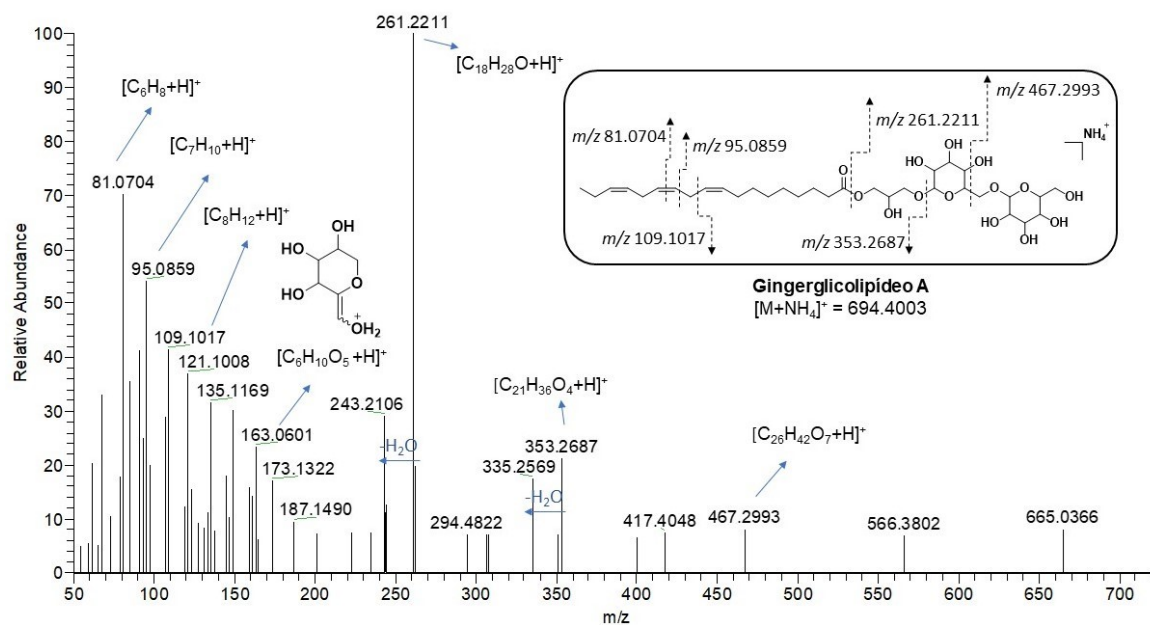

**Fig S7.** Mirror match obtained from GNPS for astragalin annotation ( $m/z$  449.1078),  $\cos = 0.92$ .

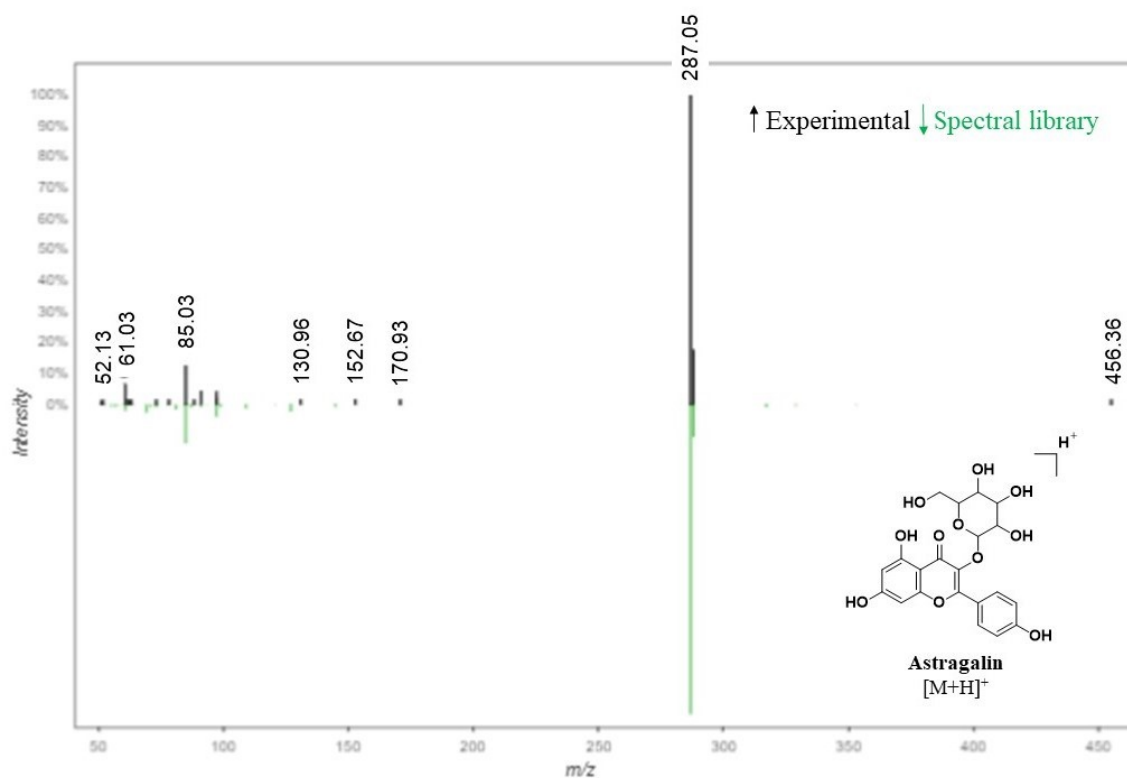

**Fig S8.** Mirror match obtained from GNPS for rutin annotation ( $m/z$  611.1598),  $\cos = 0.90$ .

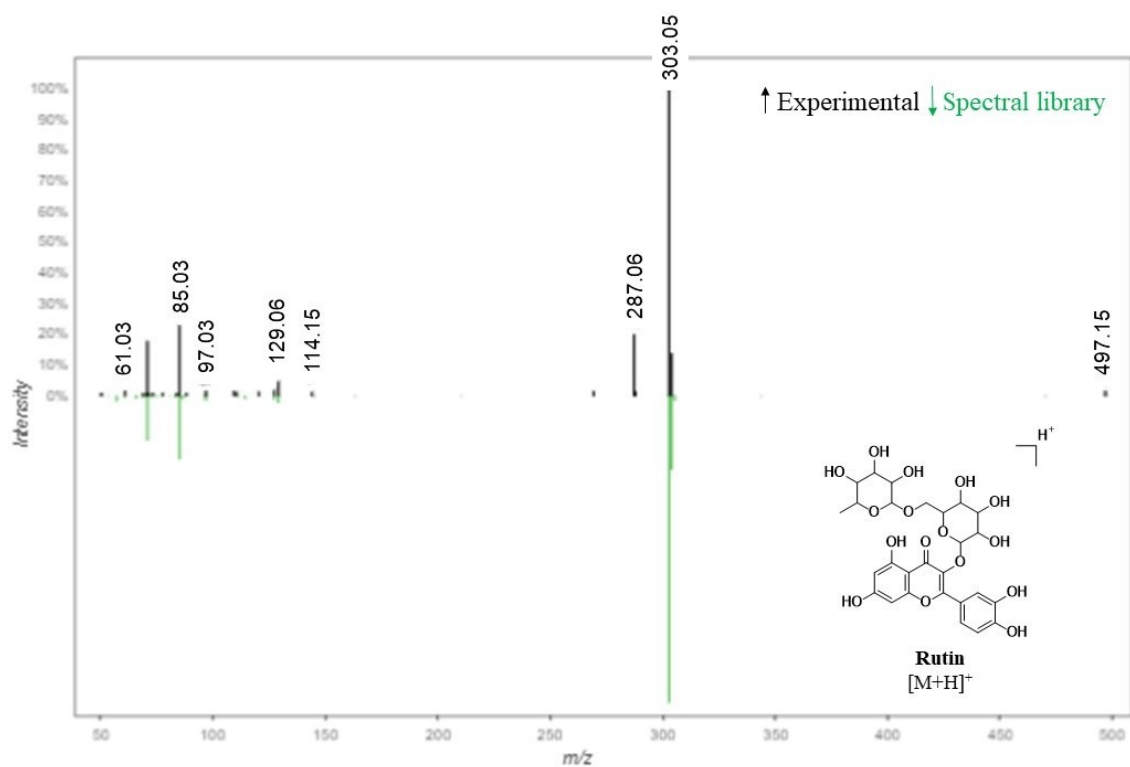

**Fig S9.** PLS-DA scores plot of leaf extracts from WST, WS and NSNT samples with 42.2% of the overall variance (18.6% for Component 1 and 23.6% for Component 2). The data were acquired by UHPLC-MS/MS, positive mode, with n = 8 (two repetitions).

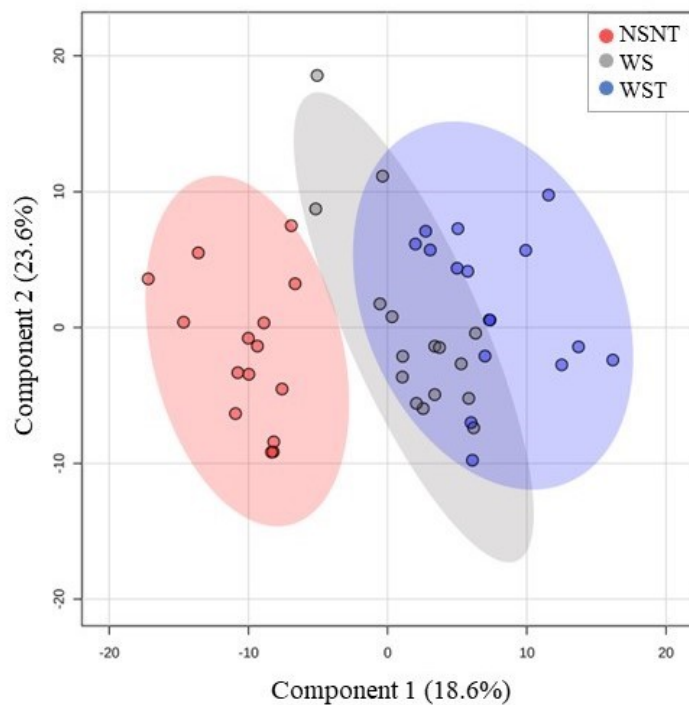

**Fig S10.** Annotation level 2 of differential metabolites obtained by the analysis of the VIP scores in the water stress assay.

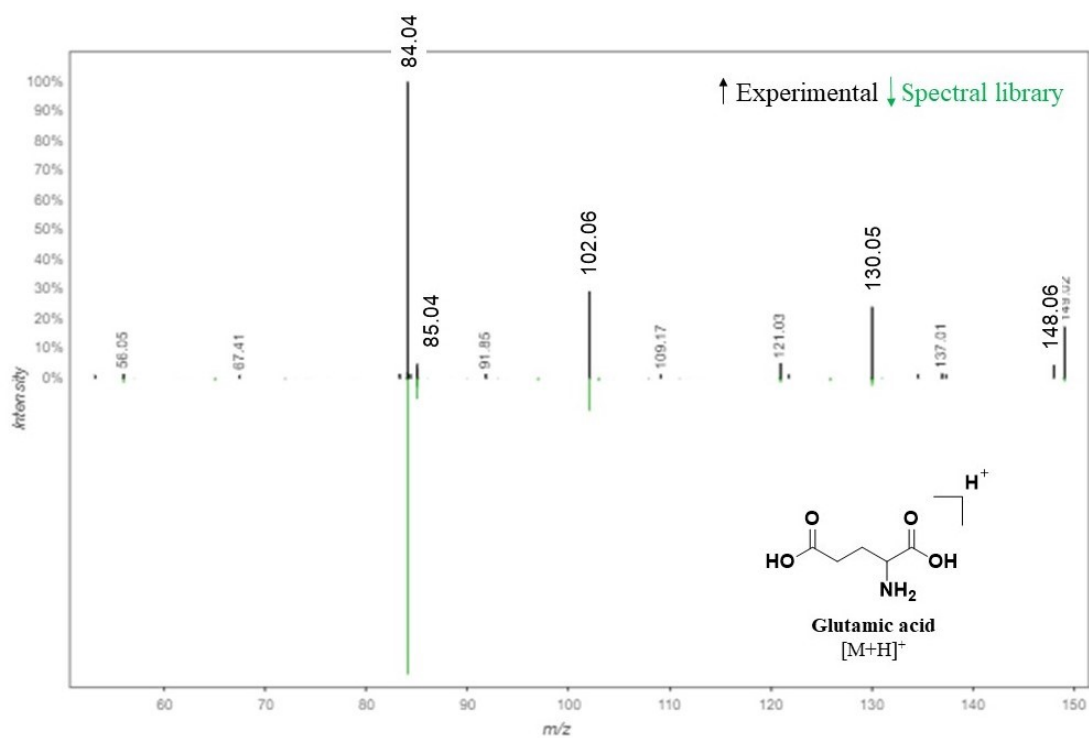

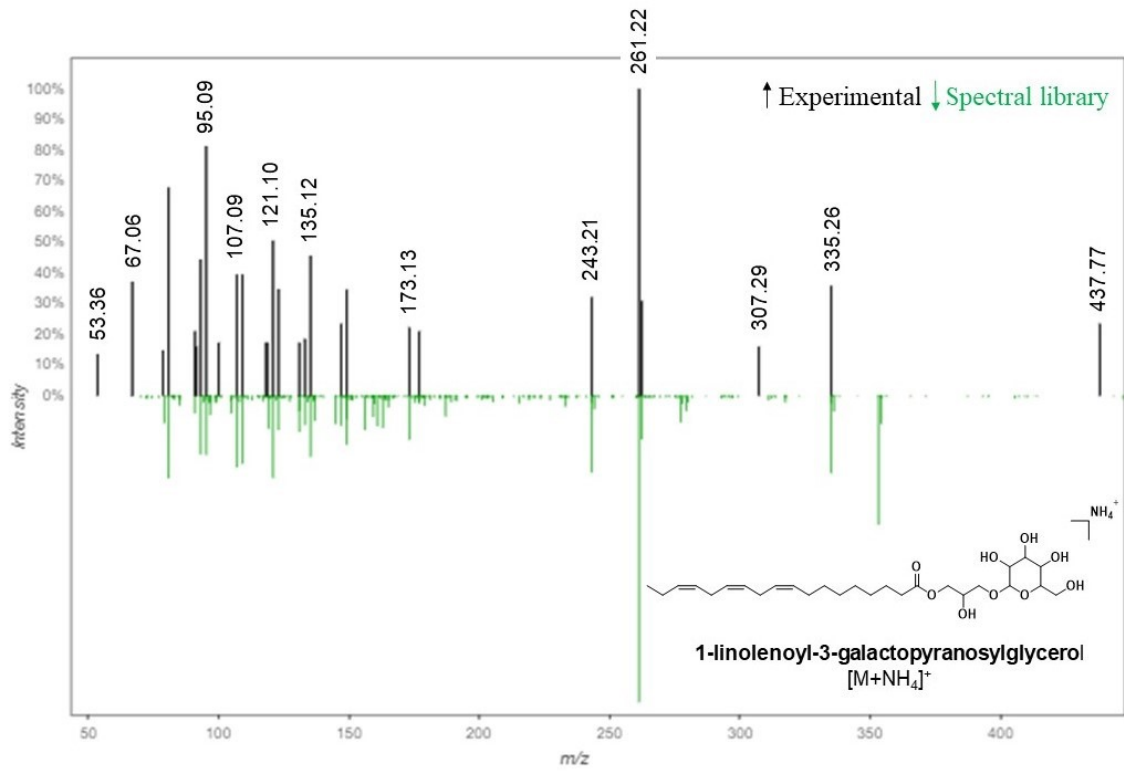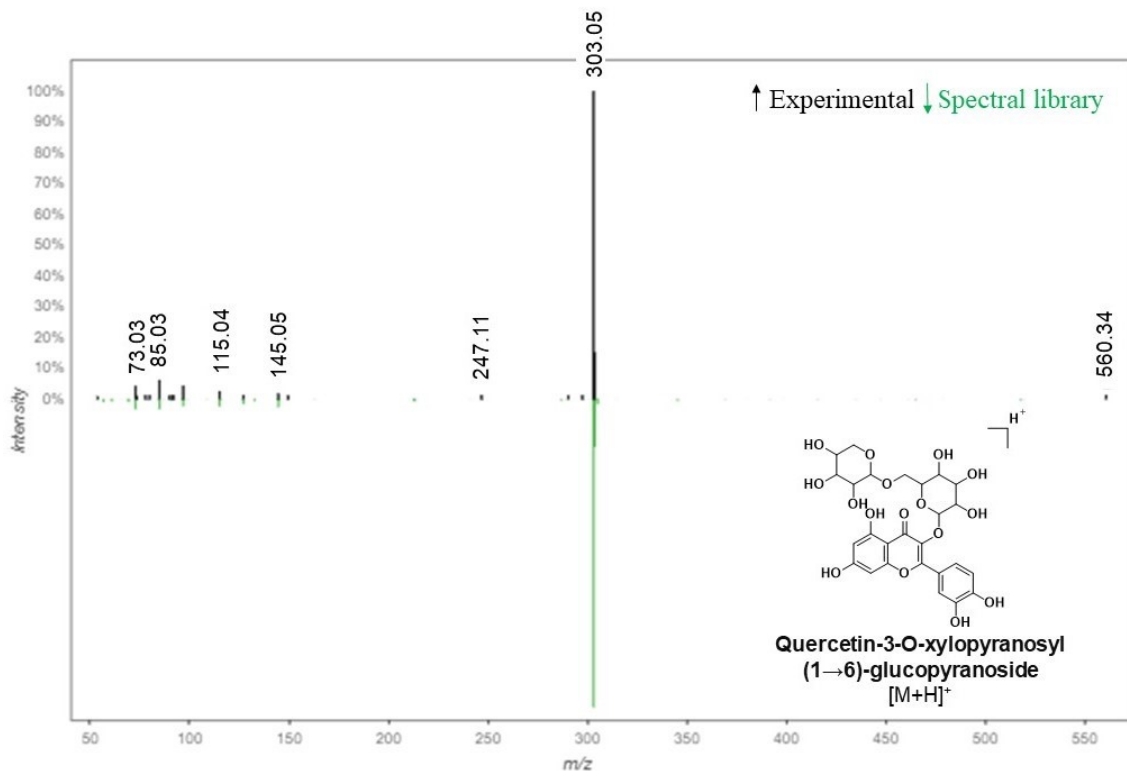



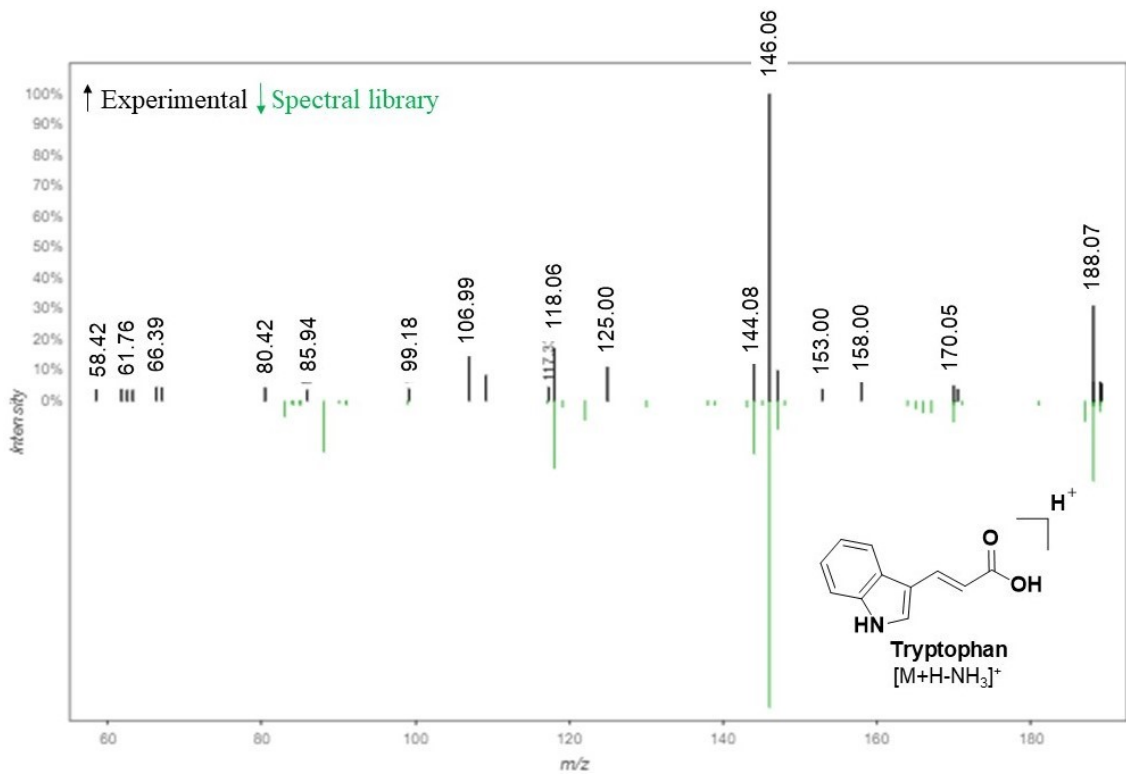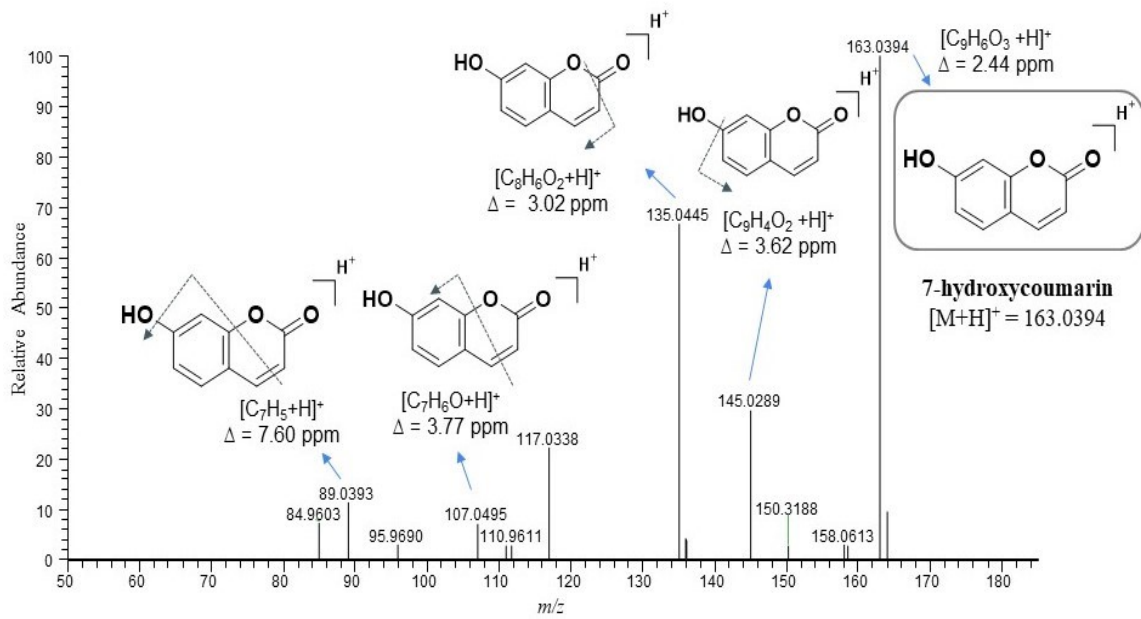

**Fig S11.** Boxplot chart of the metabolites that exhibited an increase in the concentration in the two trials subjected to water stress but more expressive in WST.

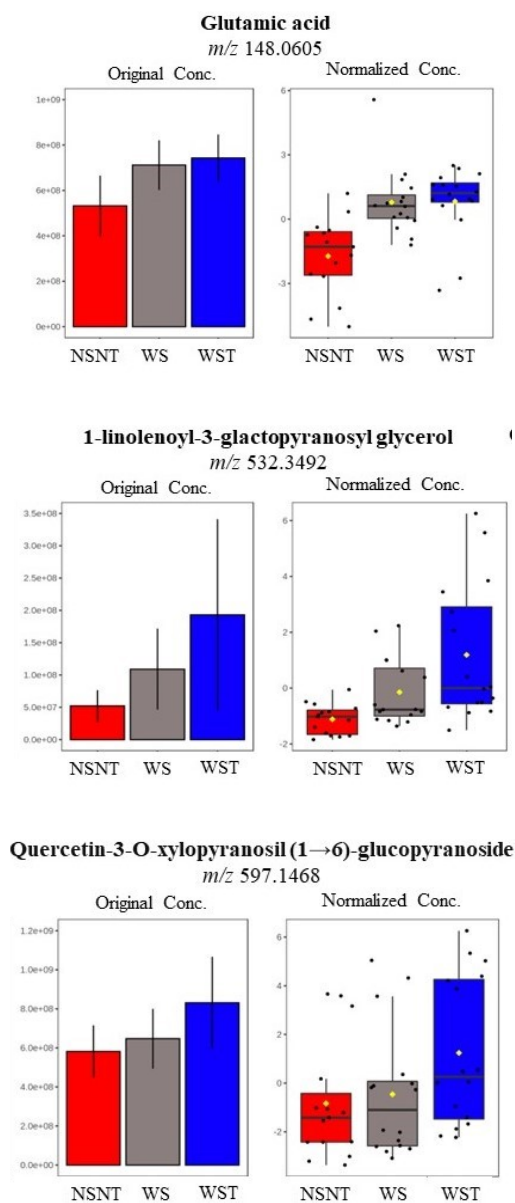

**Fig S12.** Boxplot chart of the metabolites that exhibited a decrease in the concentration in the two trials subjected to water stress (WS and WST).

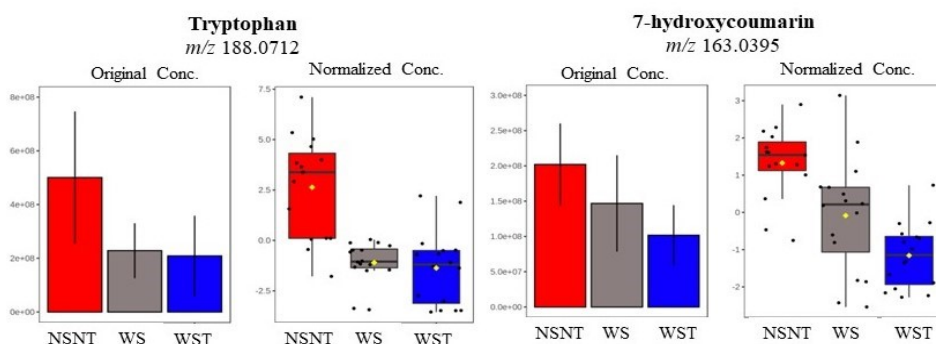

**Fig S13.** Radicles length for *P. vulgaris* seed germination assays with **A)** Exposure of photoperiod 12h/12h light/dark (+) and **B)** Complete absence of sunlight (-).

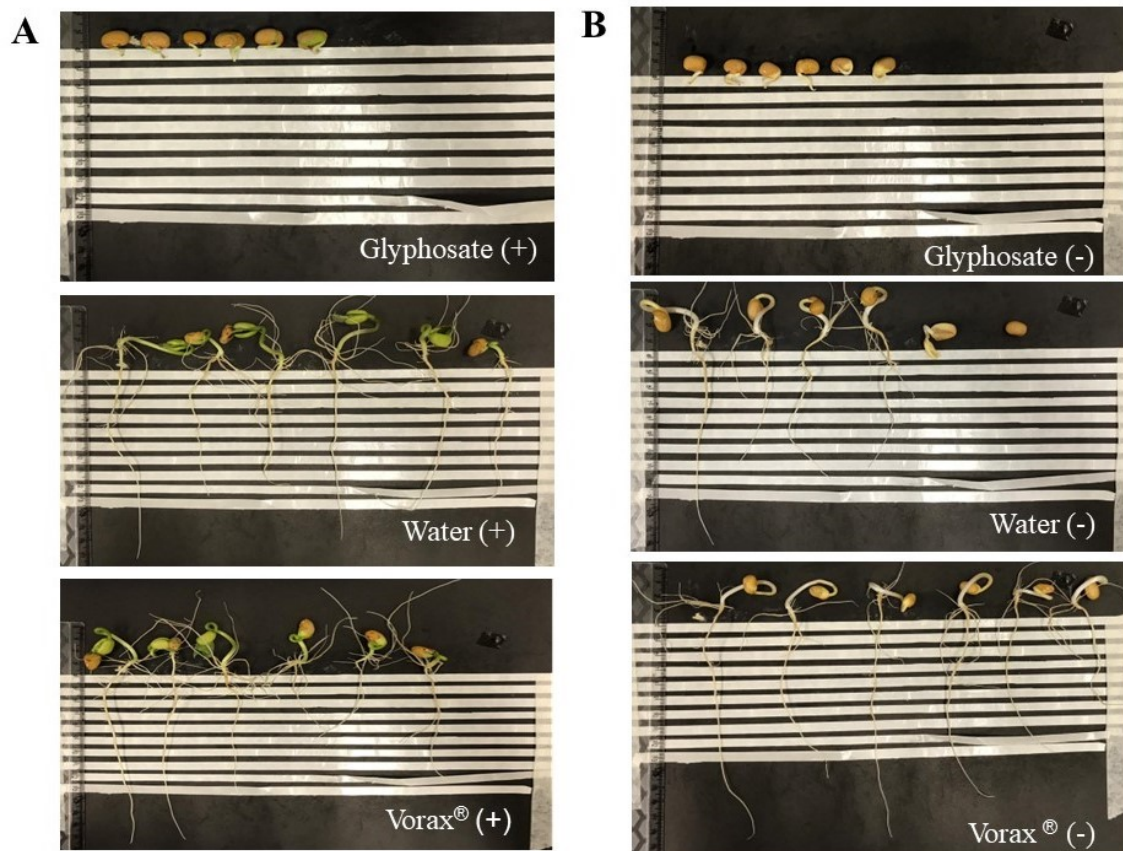

**Fig S14.** **A)** PLS-DA component 1 (29.7%) x component 2 (15.8%) with data of the two assays (+) and (-), **B)** PLS-DA comp. 1 (15.3%) x comp. 2 (20%) of the (+) data and **C)** PLS-DA comp 1 (21.2%) x comp 2 (21%) of the (-) data. The data were acquired by UHPLC-MS/MS, positive mode, with n = 5 (two repetitions).

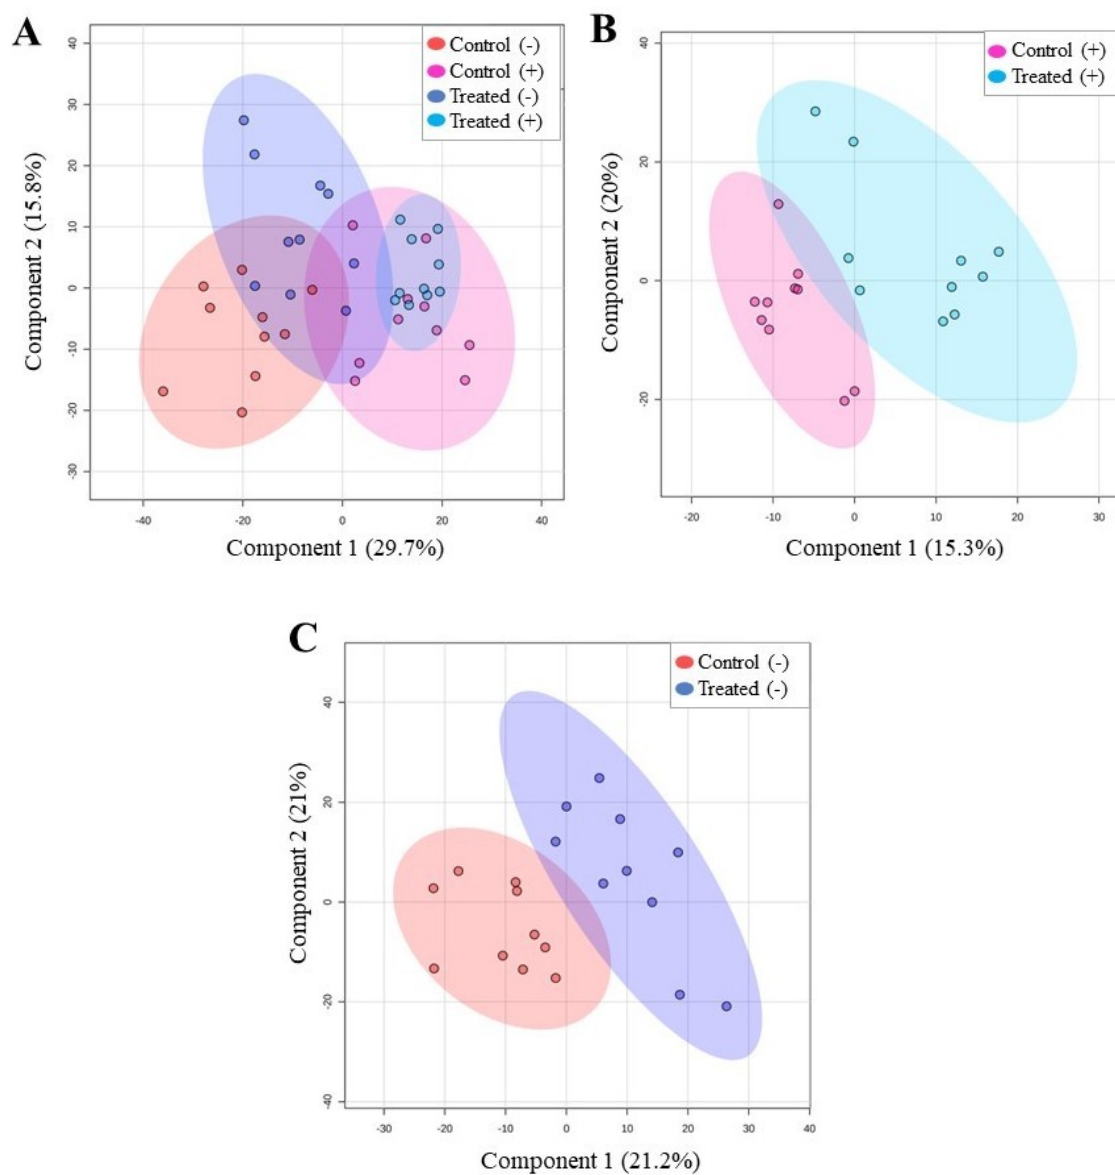

Supplement: d3mo00110e1.pdf [file d3mo00110e1.pdf]
